# Supplementary material for: Antibacterial and hydroxyapatite-forming coating for biomedical implants based on polypeptide-functionalized titania nanospikes
Source: Royal Society of Chemistry journal article supplement (doi:10.1039/c9bm01396b), 2019-10-16
Supplement: c9bm01396b1.pdf [file c9bm01396b1.pdf]

## Supporting Information

### Antibacterial and Hydroxyapatite-Forming Coating for Biomedical Implants Based on Polypeptide-Functionalized Titania Nanospikes

Qiang Gao<sup>a,b</sup>, Tao Feng<sup>c</sup>, Danni Huang<sup>a</sup>, Peng Liu<sup>e</sup>, Peng Lin<sup>f</sup>, Yan Wu<sup>f</sup>, Zhaoming Ye<sup>f</sup>, Jian Ji<sup>\*a</sup>, Peng Li<sup>\*c,d</sup> and Wei Huang<sup>c,d</sup>

<sup>a</sup>MOE Key Laboratory of Macromolecule Synthesis and Functionalization, Department of Polymer Science and Engineering, Zhejiang University, Hangzhou 310027, China

<sup>b</sup>Center for Biomedical Engineering and Regenerative Medicine, Frontier Institute of Science and Technology, Xi'an Jiaotong University, Xi'an 710049, China

<sup>c</sup>Xi'an Institute of Flexible Electronics & Xi'an Institute of Biomedical Materials and Engineering, Northwestern Polytechnical University (NPU), 127 West Youyi Road, Xi'an 710072, China

<sup>d</sup>Key Laboratory of Flexible Electronics (KLOFE), Institute of Advanced Materials (IAM), Jiangsu National Synergetic Innovation Center for Advanced Materials (SICAM), Nanjing Tech University, Nanjing 211816, China

<sup>e</sup>Key Laboratory of Biorheological Science and Technology of Ministry of Education, College of Bioengineering, Chongqing University, Chongqing 400044, China

<sup>f</sup>Department of Orthopaedics, The Second Affiliated Hospital of Zhejiang University School of Medicine, Hangzhou 310009, China

**Keywords:** biomimetic nanostructure; antibacterial coating; *N*-carboxyanhydride (NCA); polypeptide; hydroxyapatite

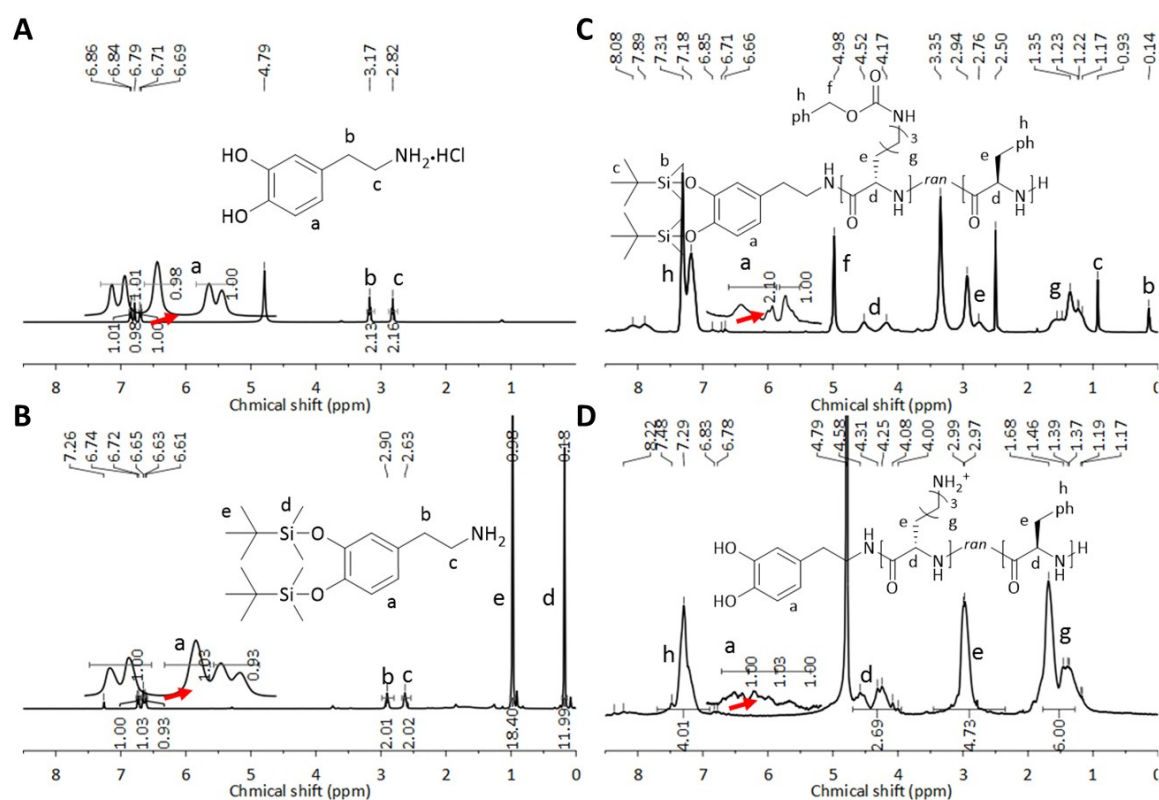

**Fig. S1.** <sup>1</sup>H-NMR spectra of A) dopamine in D<sub>2</sub>O, B) TBS-protected dopamine in CDCl<sub>3</sub>, C) TBScPep(z) in DMSO-*d*<sub>6</sub> and D) cPep in D<sub>2</sub>O.

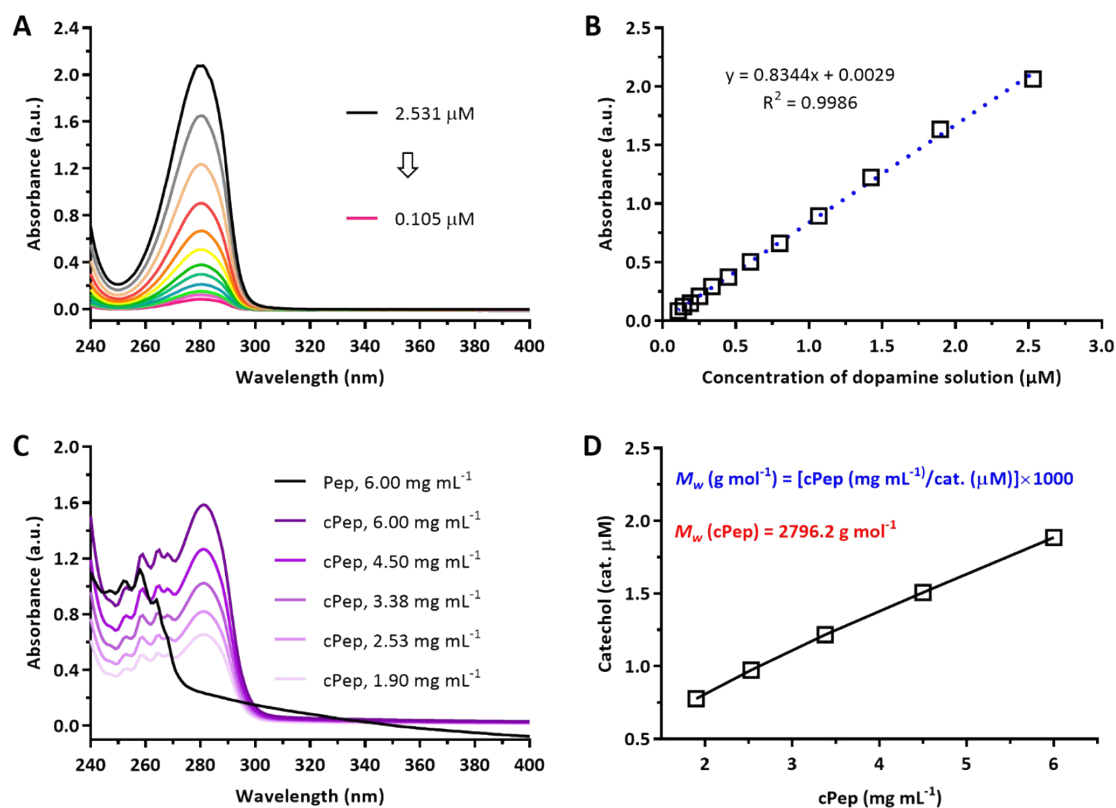

**Fig. S2.** A) UV-vis spectra of the dopamine solution. B) Standard curve of the dopamine solution. C) UV-vis spectra of the Pep (black) and cPep (violet) solution. D) The formula for calculating the molecular weight of cPep.

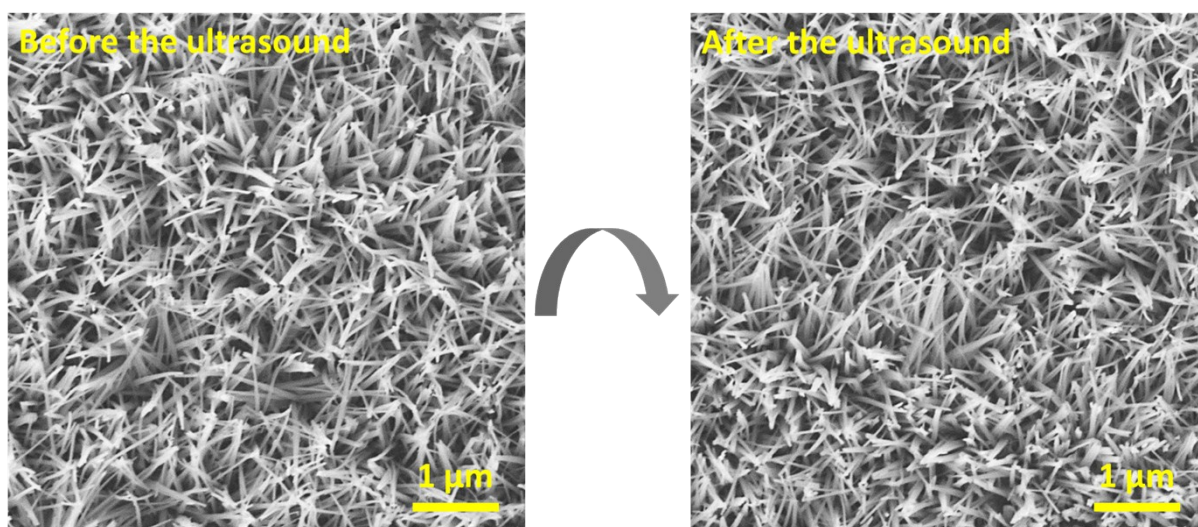

**Fig. S3.** SEM images of the TNC surface before and after the ultrasound treatment (30 min, ambient temperature).

**Table S1.** MIC of the Pep and cPep against different types of bacteria.

| Polymers         | MIC ( $\mu\text{g mL}^{-1}/\mu\text{M}$ ) <sup>a</sup> |                |                      |
|------------------|--------------------------------------------------------|----------------|----------------------|
|                  | Gram-positive                                          | Gram-negative  |                      |
|                  | <i>S. aureus</i>                                       | <i>E. coli</i> | <i>P. aeruginosa</i> |
| Pep <sup>b</sup> | 31/9                                                   | 31/9           | 31/9                 |
| cPep             | 31/9                                                   | 31/9           | 31/9                 |

<sup>a</sup>The lowest compound concentration that inhibits bacteria growth, <sup>b</sup>Pep: Lys(NH<sub>3</sub><sup>+</sup>)<sub>12.5</sub>-*r*-Phe<sub>12.5</sub>).
